# Supplementary material for: Reactivities of Hydroxycinnamic Acid Derivatives Involving Caffeic Acid toward Electrogenerated Superoxide in N,N-Dimethylformamide
Source: MDPI journal article supplement (doi:10.3390/electrochem3030024), 2022-07-05
Supplement: s1 [file s1]

Supplementary data for

# Reactivities of Hydroxycinnamic Acid Derivatives Involving Caffeic Acid toward Electrogenenerated Superoxide in *N,N*-Dimethylformamide through Proton-coupled Electron Transfer

*Tatsushi Nakayama\*<sup>†</sup> and Bunji Uno<sup>‡</sup>*

<sup>†</sup>Department of Pharmacy, Gifu Pharmaceutical University, 1-25-4 Daigaku-nishi, Gifu, 501-1196, Japan

<sup>‡</sup>Faculty of Pharmacy, Gifu University of Medical Science, 4-3-3 Nijigaoka, Kani, Gifu 509-0923, Japan

\*Phone: +81-58-230-8100 Fax: +81-58-230-8200 E-mail: [tnakayama@gifu-pu.ac.jp](mailto:tnakayama@gifu-pu.ac.jp)

## Table of contents

|           |                                                                                                                                 |
|-----------|---------------------------------------------------------------------------------------------------------------------------------|
| Pages S3  | Table S1: CV parameters                                                                                                         |
| Pages S4  | Figure S1: Scheme of in situ electrolytic ESR and UV-vis spectral system                                                        |
| Pages S5  | Table S2: Optimized geometries of CafH <sub>2</sub> (COOH)                                                                      |
| Pages S6  | Figure S2: Energy profiles along IRC of 2PCET between CafH <sub>2</sub> (COO <sup>-</sup> ) and O <sub>2</sub> <sup>•-</sup>    |
| Pages S7  | Table S3: Optimized geometries of TS of the PCET between CafH <sub>2</sub> (COOH) and O <sub>2</sub> <sup>•-</sup>              |
| Pages S8  | Table S4: Optimized geometries of TS of the PCET between CafH <sub>2</sub> (COO <sup>-</sup> ) and O <sub>2</sub> <sup>•-</sup> |
| Pages S9  | Table S5: Optimized geometries of TS of the PCET between Et-CafH <sub>2</sub> and O <sub>2</sub> <sup>•-</sup>                  |
| Pages S10 | Table S6: Optimized geometries of TS of the PCET between CatH <sub>2</sub> and O <sub>2</sub> <sup>•-</sup>                     |

**Table S1.** CV parameters

|                                                                |                                                          |                                              |                                 |
|----------------------------------------------------------------|----------------------------------------------------------|----------------------------------------------|---------------------------------|
| Working Electrode    Planar Radius 1.0 mm diameter             |                                                          |                                              |                                 |
| Geometry<br>Spherical (Hemispherical) <sup>1</sup>             |                                                          | Diffusion<br>Semi-infinite 1D                | Temperature<br>298.3 K          |
| Charge Transfer Reaction                                       |                                                          |                                              |                                 |
| O <sub>2</sub> + e <sup>−</sup> ↔ O <sub>2</sub> <sup>•−</sup> | Redox Potential (V vs Fc <sup>+</sup> /Fc)               | Coefficient                                  | Kinetics (cm s <sup>−1</sup> )  |
|                                                                | <i>E</i> = −1.284                                        | α = 0.005                                    | <i>k</i> <sub>s</sub> = 0.00927 |
| Species                                                        |                                                          |                                              |                                 |
|                                                                | Diffusion Coefficient (cm <sup>2</sup> s <sup>−1</sup> ) | Initial Concentration (mol L <sup>−1</sup> ) |                                 |
| O <sub>2</sub>                                                 | 4.76 ± 0.24 × 10 <sup>−5</sup>                           | 0.0048                                       |                                 |
| O <sub>2</sub> <sup>•−</sup>                                   | 2.15 ± 0.24 × 10 <sup>−5</sup>                           | 0                                            |                                 |

<sup>1</sup>Operating conditions were spherical diffusion (to mimic edge diffusion to the disk)

<sup>2</sup>DigiElch 4.5 ElchSoft inc. (Digital CV Simulation Software)

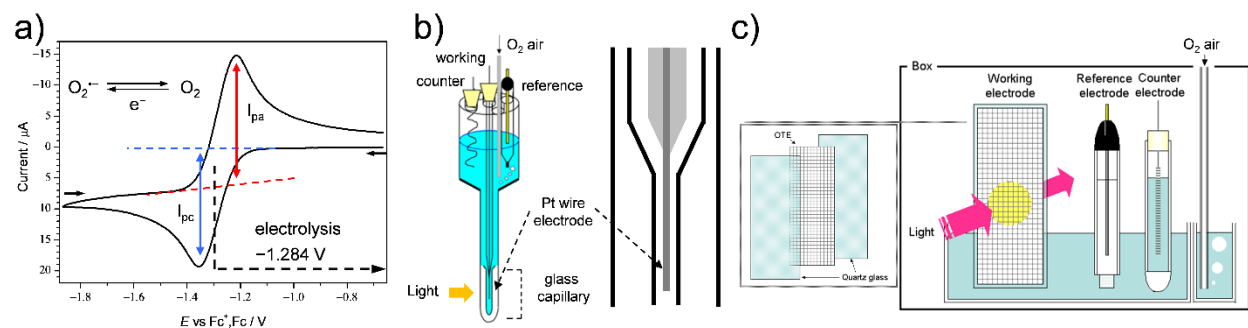

**Figure S1.** In situ electrolytic ESR and UV-vis spectral system. (a) Cyclic voltammograms of  $\text{O}_2/\text{O}_2^{\bullet -}$  for potential determination. (b) In situ ESR system, composed of an electrochemical ESR cell with a glass small tip, air tube for  $\text{O}_2$  bubbling, and three electrode system using a 0.5-mm-diameter straight Pt wire sealed in a glass capillary as working electrode (5.0 mm). (c) An optically transparent thin layer electrochemical (OTTLE) cell using a Pt mesh working electrode (10.0 mm  $\times$  20.0 mm) for in situ electrolytic UV-vis spectrometry.

**Table S2.** Optimized geometry of caffeic acid calculated using DFT-(U)B3LYP/PCM/6-311+G(3df,2p) in DMF.

| Atomic Number | Coordinates (Angstromes) |           |           |
|---------------|--------------------------|-----------|-----------|
|               | X                        | Y         | Z         |
| 6             | 1.898663                 | -1.577959 | 0.000123  |
| 6             | 0.542727                 | -1.295764 | 0.00001   |
| 6             | 0.088744                 | 0.031052  | -0.0001   |
| 6             | 1.040054                 | 1.063844  | -0.000093 |
| 6             | 2.395077                 | 0.78814   | 0.000021  |
| 6             | 2.828816                 | -0.543695 | 0.000131  |
| 1             | 2.243247                 | -2.604414 | 0.000209  |
| 1             | -0.159886                | -2.116284 | 0.000009  |
| 1             | 0.721652                 | 2.098051  | -0.000177 |
| 6             | -1.318978                | 0.393437  | -0.000216 |
| 1             | -1.526183                | 1.458504  | -0.000292 |
| 6             | -2.38264                 | -0.427095 | -0.000261 |
| 1             | -2.291756                | -1.503662 | -0.000187 |
| 6             | -3.743318                | 0.112435  | -0.000425 |
| 8             | -4.670976                | -0.874408 | 0.000231  |
| 1             | -5.545729                | -0.459084 | 0.00056   |
| 8             | -4.061088                | 1.285335  | -0.00002  |
| 8             | 4.178345                 | -0.72359  | 0.000243  |
| 1             | 4.406856                 | -1.659407 | 0.000315  |
| 8             | 3.293193                 | 1.811888  | 0.000027  |
| 1             | 4.187937                 | 1.448698  | 0.000112  |

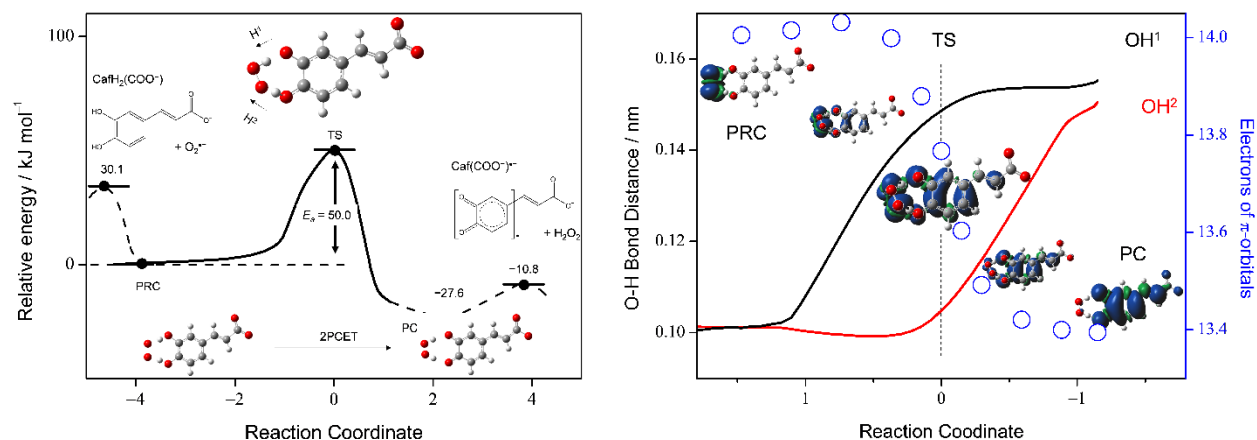

**Figure S2.** (a) Energy profile (kJ mol<sup>-1</sup>) along the intrinsic reaction coordinate of the 2PCET between CafH<sub>2</sub>(COO<sup>-</sup>) and O<sub>2</sub><sup>•-</sup> in DMF, along with the structures of free reactants, the prereactive HB complex, the transition state, product complex, and free products (Caf(COO<sup>-</sup>)<sup>•2-</sup>, H<sub>2</sub>O<sub>2</sub>). (b) Left and right vertical axes represent the O-H bond distances (OH<sup>1</sup>: black line, OH<sup>2</sup>: red line, nm) and the number of electrons (open circles) in the  $\pi$ -orbitals of CafH<sub>2</sub>(COO<sup>-</sup>), respectively. Calculations were performed using the DFT-(U)B3LYP/PCM/6-311+G(3df,2p) method.

**Table S3.** Optimized geometry of TS of 2PCET between  $\text{CafH}_2(\text{COOH})$  and  $\text{O}_2^{\bullet-}$  calculated using DFT-(U)B3LYP/PCM/6-311+G(3df,2p) in DMF.

| Atomic Number | Coordinates (Angstromes) |           |           |
|---------------|--------------------------|-----------|-----------|
|               | X                        | Y         | Z         |
| 6             | 0.274357                 | -0.864632 | 0.313259  |
| 6             | 1.642802                 | -0.50551  | 0.386349  |
| 6             | 1.950801                 | 0.907061  | 0.24344   |
| 6             | 0.905385                 | 1.829742  | 0.047014  |
| 6             | -0.407881                | 1.430155  | -0.009667 |
| 6             | -0.748337                | 0.059445  | 0.122776  |
| 1             | 1.168809                 | 2.87491   | -0.051924 |
| 1             | -1.180354                | 2.171478  | -0.156469 |
| 8             | 3.184474                 | 1.363683  | 0.340875  |
| 1             | 3.980153                 | 0.678928  | 0.12878   |
| 8             | 2.567051                 | -1.3765   | 0.596313  |
| 1             | 3.724786                 | -1.313996 | -0.399194 |
| 8             | 5.092051                 | -0.028218 | -0.302494 |
| 8             | 4.563197                 | -1.136897 | -0.953181 |
| 1             | 0.036967                 | -1.9161   | 0.421825  |
| 6             | -2.115333                | -0.418273 | 0.067674  |
| 1             | -2.240639                | -1.489417 | 0.188514  |
| 6             | -3.236155                | 0.304522  | -0.115408 |
| 1             | -3.22453                 | 1.376674  | -0.247388 |
| 6             | -4.547088                | -0.340949 | -0.145945 |
| 8             | -5.542611                | 0.558012  | -0.343542 |
| 1             | -6.380234                | 0.072371  | -0.354215 |
| 8             | -4.780251                | -1.527515 | -0.016906 |

**Table S4.** Optimized geometry of TS of 2PCET between  $\text{CafH}_2(\text{COO}^-)$  and  $\text{O}_2^{\cdot-}$  calculated using DFT-(U)B3LYP/PCM/6-311+G(3df,2p) in DMF.

| Atomic Number | Coordinates (Angstromes) |           |           |
|---------------|--------------------------|-----------|-----------|
|               | X                        | Y         | Z         |
| 6             | 0.219529                 | -0.885646 | -0.233816 |
| 6             | 1.594562                 | -0.542242 | -0.322853 |
| 6             | 1.913491                 | 0.868481  | -0.260668 |
| 6             | 0.879591                 | 1.805147  | -0.125507 |
| 6             | -0.442824                | 1.421605  | -0.055742 |
| 6             | -0.797602                | 0.050802  | -0.104782 |
| 1             | 1.150525                 | 2.852842  | -0.087194 |
| 1             | -1.209236                | 2.177879  | 0.038479  |
| 8             | 3.170598                 | 1.300811  | -0.398626 |
| 1             | 3.842588                 | 0.746369  | 0.185778  |
| 8             | 2.498818                 | -1.447604 | -0.480379 |
| 1             | 3.924325                 | -1.296567 | -0.087486 |
| 8             | 4.759237                 | 0.002639  | 1.010698  |
| 8             | 4.881544                 | -1.156042 | 0.256954  |
| 1             | -0.024108                | -1.940594 | -0.28226  |
| 6             | -2.182336                | -0.413109 | -0.028656 |
| 1             | -2.317433                | -1.488649 | -0.086399 |
| 6             | -3.292056                | 0.325369  | 0.101697  |
| 1             | -3.242776                | 1.405969  | 0.16609   |
| 6             | -4.685144                | -0.255953 | 0.163057  |
| 8             | -5.620297                | 0.587377  | 0.259659  |
| 8             | -4.818833                | -1.506113 | 0.113908  |



**Table S5.** Optimized geometry of TS of 2PCET between Et-CaH<sub>2</sub> and O<sub>2</sub><sup>•-</sup> calculated using DFT-(U)B3LYP/PCM/6-311+G(3df,2p) in DMF.

| Atomic Number | Coordinates (Angstromes) |           |           |
|---------------|--------------------------|-----------|-----------|
|               | X                        | Y         | Z         |
| 6             | -1.281829                | -0.920982 | -0.33298  |
| 6             | -2.639734                | -0.517598 | -0.372276 |
| 6             | -2.896598                | 0.905566  | -0.241908 |
| 6             | -1.816897                | 1.795165  | -0.0885   |
| 6             | -0.515776                | 1.352914  | -0.063419 |
| 6             | -0.224238                | -0.029626 | -0.185715 |
| 1             | -2.042854                | 2.849807  | 0.002702  |
| 1             | 0.284428                 | 2.070281  | 0.050548  |
| 8             | -4.118185                | 1.402657  | -0.312334 |
| 1             | -4.924358                | 0.748979  | -0.066652 |
| 8             | -3.598073                | -1.360499 | -0.542412 |
| 1             | -4.723476                | -1.246661 | 0.485844  |
| 8             | -6.051719                | 0.081272  | 0.414692  |
| 8             | -5.53748                 | -1.03539  | 1.063657  |
| 1             | -1.082475                | -1.981271 | -0.432564 |
| 6             | 1.129535                 | -0.55229  | -0.163107 |
| 1             | 1.215769                 | -1.62845  | -0.273149 |
| 6             | 2.276552                 | 0.13504   | -0.02187  |
| 1             | 2.302071                 | 1.208892  | 0.095396  |
| 6             | 3.573785                 | -0.550337 | -0.018802 |
| 8             | 4.58334                  | 0.329532  | 0.134767  |
| 8             | 3.755091                 | -1.747939 | -0.136039 |
| 6             | 5.926988                 | -0.204876 | 0.156051  |

|   |          |           |           |
|---|----------|-----------|-----------|
| 1 | 6.105753 | -0.732793 | -0.780612 |
| 1 | 6.001388 | -0.926154 | 0.969715  |
| 6 | 6.88319  | 0.951792  | 0.341001  |
| 1 | 7.906672 | 0.576621  | 0.359669  |
| 1 | 6.797451 | 1.667161  | -0.476809 |
| 1 | 6.693789 | 1.471791  | 1.279962  |

**Table S6.** Optimized geometry of TS for 2PCET between CatH<sub>2</sub> and O<sub>2</sub><sup>•-</sup> calculated using DFT-(U)B3LYP/PCM/6-311+G(3df,2p) in DMF.

| Atomic Number | Coordinates (Angstromes) |           |           |
|---------------|--------------------------|-----------|-----------|
|               | X                        | Y         | Z         |
| 6             | -1.553795                | -1.34724  | 0.076302  |
| 6             | -2.710996                | -0.614002 | 0.265952  |
| 6             | -2.67657                 | 0.788113  | 0.169724  |
| 6             | -1.493555                | 1.433803  | -0.115158 |
| 6             | -0.275619                | 0.72727   | -0.32767  |
| 6             | -0.336528                | -0.719257 | -0.220186 |
| 8             | 0.731212                 | -1.480887 | -0.451624 |
| 8             | 0.821349                 | 1.333601  | -0.623829 |
| 8             | 2.995831                 | -0.625946 | 0.093175  |
| 1             | 1.663769                 | -1.033561 | -0.289809 |
| 8             | 2.782871                 | 0.555459  | 0.798315  |
| 1             | 1.991046                 | 0.950064  | 0.294508  |
| 1             | -1.563213                | -2.427746 | 0.145416  |
| 1             | -1.455871                | 2.513397  | -0.193926 |
| 1             | -3.582881                | 1.360454  | 0.32072   |
| 1             | -3.64092                 | -1.119998 | 0.488749  |
